# Supplementary material
Source: publisher figshare collection journal article supplement (https://tandf.figshare.com/ndownloader/files/16724759)
Supplement: Supplementary file 1 [file 16724759]

## Sheet: Sayfa1
Table S1. Haplotype codes used in Fig. 3 for red fox haplotypes/sequences from Iran, Turkey and GenBank. Bold indicates the haplotypes obtained in this study (see Table 1 and https://www.ncbi.nlm.nih.gov/genbank/).
Palearctic basal haplotypes /African clade:
H.1: KJ846664; H.2: KJ846662; H.3: KJ846572; H.4: KJ846620; H.5: KJ846621; H.6: KJ846612, KJ846619, KJ846663; H.7: KJ846537;
H.8: Tr.Vv.D.25; H.9: KU378440; H.10: Ir.Vv.D.3, KJ846573; H.11: KJ846570, KU378405, KU378425, KU378441; H.12: Tr.Vv.D.22;
H.13: KJ846544, KJ846545, KU378399, KU378402, KU3478460; H.14: KJ846586; H.15: Ir.Vv.D.1; H.16: KU378398, KU378464;
H.17: KJ846546; H.18: Ir.Vv.D.2; H.19: KJ846613; H.20: KJ846569; H.21: Tr.Vv.D.23; H.22: Tr.Vv.D.24; H.23: KJ846659.
Holoarctic clade:
H.sc.1: H.24: JX868832; H.25: JN232502; H.26: JN232505; H.27: Tr.Vv.D.12; H.28:Tr.Vv.D.20, Tr.Vv.D.21; H.29: Tr.Vv.D.8, KJ846529;
H.30: KJ846523; H.31: KJ846521; H.32: KJ846525, KJ846528; H.33: KJ846658; H.34: KJ846611; H.35: KJ846519; H.36: KJ846517;
H.37: KJ846610; H.38: KJ846609; H.39: KJ846510; H.40: KJ846509; H.41: KJ846580; H.42: JN711443; H.43: KJ846579, KJ846669;
H.44: FJ830779; H.45: JN232500; H.46: Tr.Vv.D.16, KU378403; H.47: Tr.Vv.D.19, Tr.Vv.D.17, AB292748, KJ846649, KJ846655;
H.48: Tr.Vv.D.18, KU378400; H.49: Ir.Vv.D.7, KJ846654; H.50: AB292749, KJ846640; H.51: KJ846627, KU378419; H.52: JX868825;
H.53: FJ830806; H.55: HF677240; H.56: JX868813; H.57: HF968448; H.58: KJ846635, JN232481; H.59: KU378451; H.60: KU378415, KU378452;
H.61: Ir.Vv.D.6; H.62: JN232497; H.63: FJ830804, KU378448; H.64: KJ846624; H.65: JN232509; H.66: HF677241, HF677244, HF677251,
KJ846625; H.67: KU378461; H.68: KU378477, KU378480, KU378481; H.69: JN232499; H.70: JN232512; H.71: HF677249, JN232503, JN232513,
JX868834, KJ598004, KJ846567, KU378431, KU378454, KU378471, KU378475, KU378482, KU378483; H.72: KJ846549, KU378466, KU378467;
H.73: Ir.Vv.D.9, HF677248, KJ846562, JX868811, KJ846600, KU378417, KU378474, KU378478; H.74: JN232515; H.75: KJ846670;
H.76: KJ846560; H.77: HF677220, HF677222, KJ846566; H.78: JX868829; H.79: HF677206, KJ846667, KU378423, KU378485; H.80: KU378486;
H.81: Tr.Vv.D.11; H.82: FJ830811, KJ598006; H.83: AF487752; H.84: HF877203, HF677204, HF677205, HF677207, JX868826, KJ846602,
KJ846668; H.85: KJ846603; H.86: JX868827; H.87: HF677253; H.88: KJ846607; H.89: Tr.Vv.D.9, AF338790, AF338798, AF338801, AF487746,
HF677217, JX868837, KJ846527, KJ846606, KU378413, KU378420; H.90: JX868820; H.91: AF487737, AF487741; H.92: KU378438;
H.93: AF338792; H.94: KJ846589; H.95: HF677224, HF677230, HF677233, HF677243, HF677245, JX868816, KJ846557; H.96: JX868835;
H.97: KJ846601; H.98: Tr.Vv.D.14, Ir.Vv.D.10, KJ846530, KJ846531, KU378421, KU378422; H.99: AB292742, KJ846524; H.100: AB292741,
AB292743, AB292744, AB292746, KJ846518; H.101: AB292745, KJ846522; H.102: AB292747, KJ846520; H.103: Tr.Vv.D.10, FJ830810;
H.104: FJ830809; H.105: KU378404; H.106: KU378443; H.107: Tr.Vv.D.15; H.108: Tr.Vv.D.13; H.109: AF487740; H.110: AF487753;
H.111: HF677209, HF677210, HF677211, HF677212, HF677213, HF677214, HF677215, KJ846559; H.112: KU378418; H.113: JN232501;
H.114: JN232484; H.115: JN232485; H.116: AF338795; H.117: AF338789, AF338791, JN232487, JN232510, KJ846564, H.118: JN232486,
JN232511; H.119: JN232506; H.120: HF677218, HF677225, HF677226, HF677227, HF677228, HF677229, HF677231, HF677234, HF677235,
JX868821; H.121: Tr.Vv.D.1, JN232514, JX868830; H.122: KJ846555; H.123: JN232504; H.124: AJ585358, KJ846588; H.125: Tr.Vv.D.5,
KU378408, KU378433, KU378435; H.126: Tr.Vv.D.6; H.127: Tr.Vv.D.2, Tr.Vv.D.3, Tr.Vv.D.4, Ir.Vv.D.8, KJ846536, KJ846550,
KJ597999, KU378397, KU378426, KU378427, KU378428, KU378429, KU348432, KU378468, KU378476, KU378479, KU378484;
H.128: JX868836; H.129: KJ846547; H.130: KJ846587; H.131: KJ846551; H.132: KJ846552; H.133: KJ846565; H.134: Tr.Vv.D.7;
H.135: KJ846535; H.136: JX868814; H.137: JN232495; H.138: KJ846561; H.139: JN232507; H.140: KJ846563; H.141: KU378416;
H.142: KJ846614; H.143: KU378456, KU378457, KU378459; H.144: KU378414; H.145: KJ846617; H.146: KJ846571; H.147: KJ846616;
H.148: KU378406; H.149: KJ846615; H.150: KJ846618; H.151: AB292764, KJ846652, KU378401, KU378437; H.152: KU378449, KU378450;
H.153: KJ846533; H.154: KJ846532; H.155: AF338799, AM181037, FJ830778, FJ840491, HF677232, JX868817, JX868823, JX868828, KJ846554,
KJ846556; H.156: KJ846534; H.157: FJ830777; H.158: KU378412; H.159: AB292763, KJ846651; H.160: KU378472; H.161: KU378473;
H.162: AB292761, AB292762, AB292765, KJ846583; H.163: KJ846608; H.164: KJ846548; H.165: FJ830812; H.166: FJ830801; H.167: AF098155,
FJ830795, FJ830799, FJ830824; H.168: FJ830815; H.169: FJ830816; H.170: FJ830808; H.171: FJ830802; H.172: FJ830794; H.173: KJ846632;
H.174: KJ846576; H.175: KJ846622; H.176: KJ846633; H.177: JN232488; H.178: JN232498; H.179: KJ598003; H.180: KJ846584; H.181: KJ846656
H.sc.2: H.204: FJ830821; H.205: JN232489, KJ846665, KJ846666; H.206: KJ846657; H.207: HF677219, KJ846540; H.208: AF338796;
H.209: HF677236, HF677237, HF677238; H.210: AF338800, HF677216, HF677242, KJ846526; H.211: HF677246; H.212: KU378410;
H.213: JN232508; H.214: KJ846516; H.215: KU378411; H.216: Ir.Vv.D.4, Ir.Vv.D.5, HF677239, KJ846585, KJ846598, KU378407, KU378409,
KU378424, KU378430, KU378434, KU378436, KU378439, KU378442, KU378444, KU378445, KU378446, KU378462, KU378463, KU378465,
KU378469, KU378470; H.217: KJ846653; H.218: KU378447; H.219: AB292750, KJ846638; H.220: AB292751, AB292753, FJ830822, HF677208,
KJ846508, KJ846543, KJ846596, KJ846599, KJ846645, KU378455; H.221: FJ830803, HF677247, KJ846644; H.222: AB292752, KJ846629;
H.223: JX868831; H.224: HF677252, HF677254, JX868822, KJ846597; H.225: JX868824; H.226: FJ830805; H.227: KJ846568; H.228: FJ830826,
KJ846647; H.229: FJ830827; H.230: FJ830828; H.231: FJ830823, FJ830825; H.232: FJ830780; H.233: FJ830818; H.234: KU378453;
H.235: KJ846553, KJ846630, KJ846646, KU378458; H.236: KJ846628; H.237: KJ846511, KJ846626; H.238: AB292754, KJ846648;
H.239: KJ846574, KJ846578; H.240: GQ374180, KJ846631, KJ846661; H.241: KJ846639; H.242: KJ846542, KJ846577; H.243: KJ846636;
H.244: KJ846637; H.245: KJ846541; H.246: KJ846513; H.247: KJ846582; H.248: KJ846514; H.249: KF387633.
H.sc.3: H.182: KJ846581; H.183: KJ846643; H.184: KJ846539; H.185: AB292756, KJ846593; H.186: AB292755, KJ846592; H.187: AB292757,
KJ846594; H.188: AB292760, D83639, KJ846595; H.189: AB292758, KJ846590; H.190: AB292759, KJ846591; H.191: KJ846575;
H.192: KJ846641; H.193: JN232490; H.194: KJ846605; H.195: JN232483; H.196: JN232492; H.197: KJ846604; H.198: AF487738;
H.199: KJ846650; H.200: KJ846642; H.201: HF677221, HF677223, JN232491, KJ846515, KJ846538; H.202: KJ846634; H.203: JN232482, KJ846512.
H.sc.4: H.279: KJ846660; H.280: HF968444; H.281: HF968445; H.282: HF968443; H.283: HF968440; H.284: AF338794; H.285: KJ846623;
H.286: HF968441; H.287: HF968442; H.288: HF968446; H.289: HF968447; H.290: HF677250, JX868812, JX868818, KJ846558; H.291: JX868815;
H.292: JX868819.
Nearctic clade:
H.250: HM590004; H.251: FJ830813; H.252: HM590008; H.253: FJ830785, FJ830786, FJ830787; H.254: FJ830790, FJ830797;
H.255: FJ830784, FJ830788, FJ830798; H.256: FJ830789; H.257: GQ911200; H.258: GU224187; H.259: FJ830807; H.260: GQ911201, GQ911203;
H.261: GU224186; H.262: FJ830782; H.263: FJ830800; H.264: FJ830781, HM461967, HM590009; H.265: FJ830783; H.266: HM590006;
H.267: HM590005; H.268: HM461968; H.269: FJ830814; H.270: FJ830792; H.271: FJ830796; H.272: FJ830791; H.273: HM590007;
H.274: FJ830820; H.275: FJ830817; H.276: GQ911202; H.277: FJ830819; H.278: FJ830793.
